# Supplementary material
Source: Research Square preprint supplement (doi:10.21203/rs.3.rs-8929971/v1)
Supplement: Supplementary file 1 [file f90998cd672c851d64e1e156.docx]

**Table 1 Primer sequences**

| Gene Name | | Forward primer (5’→3’) | Reverse primer (5’→3’) |
| --- | --- | --- | --- |
| LACC1 | GTGTGGCTATGGCTACTGTGAATG | | GTGTGGCTATGGCTACTGTGAATG |
| IL-6 | CTGCAAGAGACTTCCATCCAG | | AGTGGTATAGACAGGTCTGTTGG |
| TNF-α | GCCTCTTCTCATTCCTGCTTGTGG | | GTGGTTTGTGAGTGTGAGGGTCTG |
